# Supplementary material
Source: HighWire-hosted journal article supplement (https://bmjopen.bmj.com/content/10/5/e036192)
Supplement: inline-supplementary-material-1 [file inline-supplementary-material-1.pdf]

**Supplementary File 1: List of included Professionals/Occupational Groups<sup>1</sup>**

1. Nurses
2. Midwives
3. Physiotherapists
4. Pharmacists
5. Paramedics
6. Dental workers
7. Radiographers
8. Psychologists
9. Psychotherapists
10. Social Workers
11. Podiatrists/chiropractors
12. Dietician
13. Music therapists
14. Drama therapists
15. Art therapists
16. Occupational therapists
17. Operating department practitioners
18. Orthoptists
19. Osteopaths
20. Prosthetists and orthotists
21. Speech and language therapists
22. Audiologists/hearing aid dispensers
23. Healthcare scientists/biomedical scientists/clinical scientists
24. Local Authority workers
25. Criminal Justice workers
26. NHS commissioned voluntary & private service workers

---

<sup>1</sup> Please note, this is not an 'official' list. Rather, it is a list compiled by the project team through consultation for the purposes of this review. The groups and sectors involved and the definitions and understanding of ACP within different groups is currently a continually contested and shifting area of healthcare policy in the UK.
