# Supplementary material
Source: HighWire-hosted journal article supplement (https://bmjopen.bmj.com/content/10/5/e036192)
Supplement: inline-supplementary-material-2 [file inline-supplementary-material-2.pdf]

## Supplementary File 2: Summarised Search Strategy

Database: Ovid MEDLINE(R) and Epub Ahead of Print, In-Process & Other Non-Indexed Citations, Daily and Versions(R) 1946 to January 24, 2020

| Search No.: | Professionals:                         | Search statement number | Search strategy                                                                                                                                                                                                                                                                                                |
|-------------|----------------------------------------|-------------------------|----------------------------------------------------------------------------------------------------------------------------------------------------------------------------------------------------------------------------------------------------------------------------------------------------------------|
| <b>1a</b>   | <b>Advanced Clinical Practitioners</b> | 1.                      | ((advanced adj2 practitioner*) or (advanced adj2 (practice* or practise*)) or "practitioner led" or "practice* led" or "practise* led") not nurs*).ti,ab,kw.                                                                                                                                                   |
|             |                                        | 2.                      | ((advanc* or exten* or expand* or enhanc* or consult* or refer* or triag*) adj2 (prescrib* or prescrip*)) not nurs*).ti,ab,kw.                                                                                                                                                                                 |
|             |                                        | 3.                      | ((advanc* or exten* or expand* or enhanc* or consult* or refer* or prescrib* or prescrip* or triag*) adj2 (practice* or practis* or practitioner* or provider* or professional* or specialist*)) not nurs*).ti,ab,kw.                                                                                          |
|             |                                        | 4.                      | 1 or 2                                                                                                                                                                                                                                                                                                         |
| <b>1b</b>   | <b>Advanced Nurse Practitioners</b>    | 5.                      | exp Advanced Practice Nursing/ or exp Nurse Clinicians/ or exp Nurse Practitioners/                                                                                                                                                                                                                            |
|             |                                        | 6.                      | (nurs* adj2 (clinical or clinician* or practice* or practis* or practitioner*)).ti,ab,kw.                                                                                                                                                                                                                      |
|             |                                        | 7.                      | ((advanc* or exten* or expand* or enhanc* or consult* or refer* or prescrib* or prescrip* or triag*) adj3 (nurs* adj2 (clinical or clinician* or practice* or practis* or practitioner*))).mp.                                                                                                                 |
|             |                                        | 8.                      | 5 or 6                                                                                                                                                                                                                                                                                                         |
| <b>1c</b>   | <b>Nurses</b>                          | 9.                      | (exp Nursing/ or exp Community Health Nursing/ or exp "Nurse's Role"/ or exp Nurses/ or exp Nursing Assistants/ or exp Licensed Practical Nurses/ or exp Nurse Specialists/) not (exp Advanced Practice Nursing/ or exp Nurse Clinicians/ or exp Nurse Practitioners/)                                         |
|             |                                        | 10.                     | ((nurs* adj2 (clinical or clinician* or scien* or technician* or technologist* or therap* or occupation* or personnel* or worker* or workforce* or manpower* or provider* or professional* or prescriber* or specialist)) or "nurse led" or "nursing led").ti,ab,kw.                                           |
|             |                                        | 11.                     | ((advanc* or exten* or expand* or enhanc* or consult* or refer* or prescrib* or prescrip* or triag*) adj3 (nurs* adj2 (clinical or clinician* or scien* or technician* or technologist* or occupation* or personnel* or worker* or workforce* or manpower* or provider* or professional* or specialist*))).mp. |
|             |                                        | 12.                     | 9 or 10                                                                                                                                                                                                                                                                                                        |
| <b>2</b>    | <b>Midwives</b>                        | 13.                     | exp Midwifery/ or exp Nurse Midwives/                                                                                                                                                                                                                                                                          |
|             |                                        | 14.                     | ((midwife* or midwife*) adj2 (clinical or clinician* or nurs* or scien* or technician* or technologist* or therap* or practice* or practis* or practitioner* or occupation* or personnel* or worker* or workforce*                                                                                             |

| Search No.:          | Professionals:                                                                        | Search statement number | Search strategy                                                                                                                                                                                                                                                                                                                                                                                                                                                                                                                                                                                 |
|----------------------|---------------------------------------------------------------------------------------|-------------------------|-------------------------------------------------------------------------------------------------------------------------------------------------------------------------------------------------------------------------------------------------------------------------------------------------------------------------------------------------------------------------------------------------------------------------------------------------------------------------------------------------------------------------------------------------------------------------------------------------|
|                      |                                                                                       |                         | or manpower* or provider* or professional* or prescriber* or specialist)) or "midwife led" or "midwives led" or "midwifery led").ti,ab,kw.                                                                                                                                                                                                                                                                                                                                                                                                                                                      |
|                      |                                                                                       | 15.                     | ((advanc* or exten* or expand* or enhanc* or consult* or refer* or prescrib* or prescrip* or triag*) adj3 ((midwife* or midwife*) adj2 (clinical or clinician* or nurs* or scien* or technician* or technologist* or practice* or practis* or practitioner* or occupation* or personnel* or worker* or workforce* or manpower* or provider* or professional* or specialist*))).mp.                                                                                                                                                                                                              |
|                      |                                                                                       | 16.                     | 13 or 14                                                                                                                                                                                                                                                                                                                                                                                                                                                                                                                                                                                        |
|                      | <b>Allied Health Professionals</b>                                                    | 17.                     | exp Allied Health Personnel/ or exp Allied Health Occupations/                                                                                                                                                                                                                                                                                                                                                                                                                                                                                                                                  |
|                      |                                                                                       | 18.                     | ((allied adj health* adj2 (clinical or clinician* or nurs* or scien* or technician* or technologist* or therap* or practice* or practis* or practitioner* or occupation* or personnel* or worker* or workforce* or manpower* or provider* or professional* or prescriber* or specialist)) or AHP or AHPs or (lead adj2 AHP*) or "AHP led" or "AHPs led").ti,ab,kw.                                                                                                                                                                                                                              |
|                      |                                                                                       | 19.                     | ((advanc* or exten* or expand* or enhanc* or consult* or refer* or prescrib* or prescrip* or triag*) adj3 ((allied adj health* adj2 (clinical or clinician* or nurs* or scien* or technician* or technologist* or practice* or practis* or practitioner* or occupation* or personnel* or worker* or workforce* or manpower* or provider* or professional* or specialist*))) or AHP or AHPs)).mp.                                                                                                                                                                                                |
|                      |                                                                                       | 20.                     | 17 or 18                                                                                                                                                                                                                                                                                                                                                                                                                                                                                                                                                                                        |
| <b>9, 13, 14, 15</b> | <b>Psychotherapists (includes Art Therapists, Drama Therapists, Music Therapists)</b> | 21.                     | exp art therapy/ or dance therapy/ or exp music therapy/ or Sensory Art Therapies/ or exp Psychodrama/                                                                                                                                                                                                                                                                                                                                                                                                                                                                                          |
|                      |                                                                                       | 22.                     | exp Psychotherapy/ or exp Mental Health Services/ or exp Psychoanalysis/                                                                                                                                                                                                                                                                                                                                                                                                                                                                                                                        |
|                      |                                                                                       | 23.                     | (((((sensory* or (art not (HIV or antiretroviral* or retroviral*)) or arts or danc* or drama* or music*) adj2 (psychotherap* or psycho-therap* or therap* or psycholog*)) or dramatherap* or psychodrama or psycho-drama) adj2 (clinical or clinician* or nurs* or scien* or technician* or technologist* or therap* or practice* or practis* or practitioner* or occupation* or personnel* or worker* or workforce* or manpower* or provider* or professional* or prescriber* or specialist*))).ti,ab,kw.                                                                                      |
|                      |                                                                                       | 24.                     | ((((psychotherap* or psycho-therap* or psychoanaly* or psycho-analy* or psychodynam* or psychodynam* or hypnopsychotherap* or hypno-psychotherap* or hypnotherap* or hypnotherap* or (talking* adj2 therap*)) adj2 (clinical or clinician* or nurs* or scien* or technician* or technologist* or therap* or practice* or practis* or practitioner* or occupation* or personnel* or worker* or workforce* or manpower* or provider* or professional* or prescriber* or specialist*)) or "psychotherapist* led" or "psychotherapy led" or "psychoanalyst* led" or "psychoanalysis led").ti,ab,kw. |

| Search No.: | Professionals:     | Search statement number | Search strategy                                                                                                                                                                                                                                                                                                                                                                                                                                                                                                                                                                                                                                                                     |
|-------------|--------------------|-------------------------|-------------------------------------------------------------------------------------------------------------------------------------------------------------------------------------------------------------------------------------------------------------------------------------------------------------------------------------------------------------------------------------------------------------------------------------------------------------------------------------------------------------------------------------------------------------------------------------------------------------------------------------------------------------------------------------|
|             |                    | 25.                     | ((advanc* or exten* or expand* or enhanc* or consult* or refer* or prescrib* or prescrip* or triag*) adj3 (((sensory* or (art not (HIV or antiretroviral* or retroviral)) or arts or danc* or drama* or music*) adj2 (psychotherap* or psycho-therap* or therap* or psycholog*)) or dramatherap* or psychodrama or psycho-drama) adj2 (clinical or clinician* or nurs* or scien* or technician* or technologist* or practice* or practis* or practitioner* or occupation* or personnel* or worker* or workforce* or manpower* or provider* or professional* or specialist*))).mp.                                                                                                   |
|             |                    | 26.                     | ((advanc* or exten* or expand* or enhanc* or consult* or refer* or prescrib* or prescrip* or triag*) adj3 (((psychotherap* or psycho-therap* or psychoanaly* or psycho-analy* or psychodynam* or psychodynam* or hypnopsychotherap* or hypno-psychotherap* or hypnotherap* or (talking* adj2 therap*)) adj2 (clinical or clinician* or nurs* or scien* or technician* or technologist* or therap* or practice* or practis* or practitioner* or occupation* or personnel* or worker* or workforce* or manpower* or provider* or professional* or prescriber* or specialist*)) or "psychotherapist* led" or "psychotherapy led" or "psychoanalyst* led" or "psychoanalysis led")).mp. |
|             |                    | 27.                     | 21 or 22 or 23 or 24                                                                                                                                                                                                                                                                                                                                                                                                                                                                                                                                                                                                                                                                |
| <b>11</b>   | <b>Podiatrists</b> | 28.                     | exp Podiatry/                                                                                                                                                                                                                                                                                                                                                                                                                                                                                                                                                                                                                                                                       |
|             |                    | 29.                     | ((chiropr* or podiatr* or pedorth* or foot or feet or ankle* or toe* or heel*) adj2 (clinical or clinician* or nurs* or scien* or technician* or technologist* or therap* or practice* or practis* or practitioner* or occupation* or personnel* or worker* or workforce* or manpower* or provider* or professional* or prescriber* or specialist*)) or chiropr* or podiatrist* or "podiatry led" or "chiropr* led").ti,ab,kw.                                                                                                                                                                                                                                                      |
|             |                    | 30.                     | ((advanc* or exten* or expand* or enhanc* or consult* or refer* or prescrib* or prescrip* or triag*) adj3 (chiropr* or podiatr* or pedorth* or foot or feet or ankle* or toe* or heel*) adj2 (clinical or clinician* or nurs* or scien* or technician* or technologist* or therap* or practice* or practis* or practitioner* or occupation* or personnel* or worker* or workforce* or manpower* or provider* or professional* or specialist*)) or chiropr* or podiatrist* or "podiatry led" or "chiropr* led").mp.                                                                                                                                                                  |
|             |                    | 31.                     | 28 or 29                                                                                                                                                                                                                                                                                                                                                                                                                                                                                                                                                                                                                                                                            |
| <b>12</b>   | <b>Dietitians</b>  | 32.                     | exp Nutritionists/ or exp Nutritional Sciences/                                                                                                                                                                                                                                                                                                                                                                                                                                                                                                                                                                                                                                     |
|             |                    | 33.                     | ((dietit* or dietet* or dietic* or nutrition*) adj2 (clinical or clinician* or nurs* or scien* or technician* or technologist* or therap* or practice* or practis* or practitioner* or occupation* or personnel* or worker* or workforce* or manpower* or provider* or professional* or prescriber* or specialist*)) or dietitian* or dietician* or nutritionist* or "diet* led" or "nutrit* led").ti,ab,kw.                                                                                                                                                                                                                                                                        |

| Search No.: | Professionals:                     | Search statement number | Search strategy                                                                                                                                                                                                                                                                                                                                                                                                                                                        |
|-------------|------------------------------------|-------------------------|------------------------------------------------------------------------------------------------------------------------------------------------------------------------------------------------------------------------------------------------------------------------------------------------------------------------------------------------------------------------------------------------------------------------------------------------------------------------|
|             |                                    | 34.                     | ((advanc* or exten* or expand* or enhanc* or consult* or refer* or prescrib* or prescrip* or triag*) adj3 (dietit* or dietet* or nutrition*) adj2 (clinician* or nurs* or scien* or technician* or technologist* or therap* or practice* or practis* or practitioner* or occupation* or personnel* or worker* or workforce* or manpower* or provider* or professional*)) or "diet* led" or "nutrit* led").mp.                                                          |
|             |                                    | 35.                     | 32 or 33                                                                                                                                                                                                                                                                                                                                                                                                                                                               |
| 16          | Occupational Therapists            | 36.                     | exp Occupational Therapists/ or exp Occupational Therapy/                                                                                                                                                                                                                                                                                                                                                                                                              |
|             |                                    | 37.                     | ((OT or occupational*) adj2 (clinical or clinician* or nurs* or scien* or technician* or technologist* or therap* or practice* or practis* or practitioner* or personnel* or worker* or workforce* or manpower* or provider* or professional* or prescriber* or specialist*)) or "occupational therap* led" or "OT led").ti,ab,kw.                                                                                                                                     |
|             |                                    | 38.                     | ((advanc* or exten* or expand* or enhanc* or consult* or refer* or prescrib* or prescrip* or triag*) adj3 (OT or occupational*) adj2 (clinical or clinician* or nurs* or scien* or technician* or technologist* or therap* or practice* or practis* or practitioner* or personnel* or worker* or workforce* or manpower* or provider* or professional* or specialist*)) or "occupational therap* led" or "OT led").mp.                                                 |
|             |                                    | 39.                     | 36 or 37                                                                                                                                                                                                                                                                                                                                                                                                                                                               |
| 17          | Operation Department Practitioners | 40.                     | exp Perioperative Nursing/ or exp Operating Room Technicians/                                                                                                                                                                                                                                                                                                                                                                                                          |
|             |                                    | 41.                     | (ODP or ODPs or ORT or ORTs or ((perioperat* or peri-operat* or operat*) adj2 (clinical or clinician* or nurs* or scien* or technician* or technologist* or therap* or practice* or practis* or practitioner* or personnel* or occupation* or worker* or workforce* or manpower* or provider* or professional* or prescriber* or specialist*)) or ODP-led or ORT-led).ti,ab,kw.                                                                                        |
|             |                                    | 42.                     | ((advanc* or exten* or expand* or enhanc* or consult* or refer* or prescrib* or prescrip* or triag*) adj3 (ODP or ODPs or ORT or ORTs or ((perioperat* or peri-operat* or operat*) adj2 (clinical or clinician* or nurs* or scien* or technician* or technologist* or therap* or practice* or practis* or practitioner* or personnel* or occupation* or worker* or workforce* or manpower* or provider* or professional* or specialist*)))) or ODP-led or ORT-led).mp. |
|             |                                    | 43.                     | 40 or 41                                                                                                                                                                                                                                                                                                                                                                                                                                                               |
| 18          | Orthoptists                        | 44.                     | exp Orthoptics/ or exp Optometrists/ or exp Optometry/ or exp Ophthalmologists/ or exp Ophthalmology/                                                                                                                                                                                                                                                                                                                                                                  |
|             |                                    | 45.                     | (orthopti* or pleoptic* or optomet* or ophthalm* or ((intraocular* or intra-ocular* or ocular* or eye* or retina* or optic* or cornea* or cataract* or iris* or blind* or conjunctiva* or cornea* or lacrima* or lens*                                                                                                                                                                                                                                                 |

| Search No.: | Professionals: | Search statement number | Search strategy                                                                                                                                                                                                                                                                                                                                                                                                                                                                                                                                                                                                                                                                                                                                                                                  |
|-------------|----------------|-------------------------|--------------------------------------------------------------------------------------------------------------------------------------------------------------------------------------------------------------------------------------------------------------------------------------------------------------------------------------------------------------------------------------------------------------------------------------------------------------------------------------------------------------------------------------------------------------------------------------------------------------------------------------------------------------------------------------------------------------------------------------------------------------------------------------------------|
|             |                |                         | or orbit* or pupil* or sclera* or sight or uvea* or vision) adj2 (clinical or clinician* or nurs* or scien* or technician* or technologist* or therap* or practice* or practis* or practitioner* or personnel* or occupation* or worker* or workforce* or manpower* or provider* or professional* or prescriber* or specialist* or (special adj (need* or education*)))) or orthoptist* or optometrist* or ophthalmologist* or "orthoptist* led" or "orthoptic* led").ti,ab,kw.                                                                                                                                                                                                                                                                                                                  |
|             |                | 46.                     | ((((advanc* or exten* or expand* or enhanc* or consult* or refer* or prescrib* or prescrip* or triag*) adj3 ((orthopti* or pleoptic* or optomet* or ophthalm* or (intraocular* or intra-ocular* or ocular* or eye* or retina* or optic* or cornea* or cataract* or iris* or blind* or conjunctiva* or cornea* or lacrima* or lens* or orbit* or pupil* or sclera* or sight or uvea* or vision)) adj2 (clinical or clinician* or nurs* or scien* or technician* or technologist* or therap* or practice* or practis* or practitioner* or personnel* or occupation* or worker* or workforce* or manpower* or provider* or professional* or specialist* or (special adj (need* or education*)))))) or orthoptist* or optometrist* or ophthalmologist* or "orthoptist* led" or "orthoptic* led").mp. |
|             |                | 47.                     | 44 or 45                                                                                                                                                                                                                                                                                                                                                                                                                                                                                                                                                                                                                                                                                                                                                                                         |
| 19          | Osteopaths     | 48.                     | exp Osteopathic Physicians/ or exp Osteopathic Medicine/                                                                                                                                                                                                                                                                                                                                                                                                                                                                                                                                                                                                                                                                                                                                         |
|             |                | 49.                     | ((((osteopath* or osteo-path*) adj2 (clinical or clinician* or nurs* or scien* or technician* or technologist* or therap* or practice* or practis* or practitioner* or occupation* or personnel* or worker* or workforce* or manpower* or provider* or professional* or prescriber* or specialist*)) or osteopath or osteopaths or "osteopath* led").ti,ab,kw.                                                                                                                                                                                                                                                                                                                                                                                                                                   |
|             |                | 50.                     | ((((advanc* or exten* or expand* or enhanc* or consult* or refer* or prescrib* or prescrip* or triag*) adj3 (osteopath* or osteo-path*) adj2 (clinical or clinician* or nurs* or scien* or technician* or technologist* or therap* or practice* or practis* or practitioner* or occupation* or personnel* or worker* or workforce* or manpower* or provider* or professional* or specialist*)) or osteopath or osteopaths or "osteopath* led").mp.                                                                                                                                                                                                                                                                                                                                               |
|             |                | 51.                     | 48 or 49                                                                                                                                                                                                                                                                                                                                                                                                                                                                                                                                                                                                                                                                                                                                                                                         |
| 20          | Prosthetists   | 52.                     | exp "Prostheses and Implants"/ and (exp "Referral and Consultation"/ or exp Triage/ or exp Professional Role/ or exp Professional Competence/ or exp "Attitude of Health Personnel"/ or exp Credentialing/)                                                                                                                                                                                                                                                                                                                                                                                                                                                                                                                                                                                      |
|             |                | 53.                     | ((((prothes* or prosthet* or orthoti*) adj2 (clinical or clinician* or nurs* or scien* or technician* or technologist* or therap* or practice* or practis* or practitioner* or personnel* or occupation* or                                                                                                                                                                                                                                                                                                                                                                                                                                                                                                                                                                                      |

| Search No.: | Professionals:   | Search statement number | Search strategy                                                                                                                                                                                                                                                                                                                                                                                                                                                                                                                                                                             |
|-------------|------------------|-------------------------|---------------------------------------------------------------------------------------------------------------------------------------------------------------------------------------------------------------------------------------------------------------------------------------------------------------------------------------------------------------------------------------------------------------------------------------------------------------------------------------------------------------------------------------------------------------------------------------------|
|             |                  |                         | worker* or workforce* or manpower* or provider* or professional* or prescriber* or specialist*)) or prosthetist* or orthotist* or "prosthet* led" or "orthot* led").ti,ab,kw.                                                                                                                                                                                                                                                                                                                                                                                                               |
|             |                  | 54.                     | (((advanc* or exten* or expand* or enhanc* or consult* or refer* or prescrib* or prescrip* or triag*) adj3 (prothes* or prosthet* or orthoti*) adj2 (clinical or clinician* or nurs* or scien* or technician* or technologist* or therap* or practice* or practis* or practitioner* or personnel* or occupation* or worker* or workforce* or manpower* or provider* or professional* or specialist*)) or prosthetist* or orthotist* or "prosthet* led" or "orthot* led").mp.                                                                                                                |
| 5           | Paramedics       | 55.                     | (exp Emergency Medical Services/ or Ambulances/ or Air Ambulances/) and (exp "Referral and Consultation"/ or exp Triage/ or exp Professional Role/ or exp Professional Competence/ or exp "Attitude of Health Personnel"/ or exp Credentialing/)                                                                                                                                                                                                                                                                                                                                            |
|             |                  | 56.                     | exp Emergency Medical Technicians/                                                                                                                                                                                                                                                                                                                                                                                                                                                                                                                                                          |
|             |                  | 57.                     | (((paramedic* or para-medic* or ambulance* or urgen* or critical* or immediate* or emergenc* or prehospital* or pre-hospital* or EMS or EMT or HEMT or "first-respon*") adj2 (clinical or clinician* or nurs* or scien* or technician* or technologist* or therap* or practice* or practis* or practitioner* or personnel* or occupation* or worker* or workforce* or manpower* or provider* or professional* or prescriber* or specialist*)) or paramedic or paramedics or "paramedic* led").ti,ab,kw.                                                                                     |
|             |                  | 58.                     | (((advanc* or exten* or expand* or enhanc* or consult* or refer* or prescrib* or prescrip* or triag*) adj3 (paramedic* or para-medic* or ambulance* or urgen* or critical* or immediate* or emergenc* or prehospital* or pre-hospital* or EMS or EMT or HEMT or "first-respon*") adj2 (clinical or clinician* or nurs* or scien* or technician* or technologist* or therap* or practice* or practis* or practitioner* or personnel* or occupation* or worker* or workforce* or manpower* or provider* or professional* or specialist*)) or paramedic or paramedics or "paramedic* led").mp. |
|             |                  | 59.                     | 56 or 57                                                                                                                                                                                                                                                                                                                                                                                                                                                                                                                                                                                    |
| 3           | Physiotherapists | 60.                     | exp Physical Therapists/ or exp Physical Therapist Assistants/ or exp Physical Therapy Specialty/ or exp Physical Therapy Modalities/                                                                                                                                                                                                                                                                                                                                                                                                                                                       |
|             |                  | 61.                     | (((physio-therap* or physiotherap* or physio or physios or pathophysiol* or ((physical* adj therap*) or musculoskeletal* or MSK)) adj2 (clinical* or clinician* or nurs* or scien* or technician* or technologist* or therap* or practice* or practis* or practitioner* or occupation* or personnel* or worker* or workforce* or manpower* or provider* or professional* or prescriber* or specialist*)) or physiotherapist* or (physical adj therapist*) or "physio* led" or "physical therap* led").ti,ab,kw.                                                                             |

| Search No.: | Professionals:                                                                                                                                                                                           | Search statement number | Search strategy                                                                                                                                                                                                                                                                                                                                                                                                                                                                                                                                                                                                                                                      |
|-------------|----------------------------------------------------------------------------------------------------------------------------------------------------------------------------------------------------------|-------------------------|----------------------------------------------------------------------------------------------------------------------------------------------------------------------------------------------------------------------------------------------------------------------------------------------------------------------------------------------------------------------------------------------------------------------------------------------------------------------------------------------------------------------------------------------------------------------------------------------------------------------------------------------------------------------|
|             |                                                                                                                                                                                                          | 62.                     | ((advanc* or exten* or expand* or enhanc* or consult* or refer* or prescrib* or prescrip* or triag*) adj3 (physio-therap* or physiotherap* or physio or physios or pathophysiol* or (physical* adj therap*) or musculoskeletal* or MSK) adj2 (clinical or clinician* or nurs* or scien* or technician* or technologist* or therap* or practice* or practis* or practitioner* or occupation* or personnel* or worker* or workforce* or manpower* or provider* or professional* or specialist*)) or "physio* led" or "physical therap* led").mp.                                                                                                                       |
|             |                                                                                                                                                                                                          | 63.                     | 60 or 61                                                                                                                                                                                                                                                                                                                                                                                                                                                                                                                                                                                                                                                             |
| 7           | Radiographers                                                                                                                                                                                            | 64.                     | exp Radiography/ or exp Radiotherapy/ or exp Technology, Radiologic/ or exp Radiometry/ or exp Radiotherapy Dosage/ or exp Radiation Oncology/ or exp Radiotherapy, Intensity-Modulated/ or exp Radionuclide Imaging/ or exp Radiopharmaceuticals/                                                                                                                                                                                                                                                                                                                                                                                                                   |
|             |                                                                                                                                                                                                          | 65.                     | exp Brachytherapy/ or exp Mammography/ or exp Radiographic Image Interpretation, Computer-Assisted/ or exp Radiotherapy Planning, Computer-Assisted/ or exp Nuclear Medicine/ or exp Ultrasonography/ or exp Fluoroscopy/ or exp biopsy, needle/ or exp image-guided biopsy/ or exp sentinel lymph node biopsy/                                                                                                                                                                                                                                                                                                                                                      |
|             |                                                                                                                                                                                                          | 66.                     | (64 or 65) and (exp "Referral and Consultation"/ or exp Triage/ or exp Professional Role/ or exp Professional Competence/ or exp "Attitude of Health Personnel"/ or exp Credentialing/)                                                                                                                                                                                                                                                                                                                                                                                                                                                                              |
|             |                                                                                                                                                                                                          | 67.                     | ((radiograph* or radiologic* or radiotherap* or (diagnos* adj2 imag*) or radiation) adj2 (clinical or clinician* or nurs* or scien* or technician* or technologist* or therap* or practice* or practis* or practitioner* or personnel* or occupation* or worker* or workforce* or provider* or manpower* or professional* or prescriber* or specialist*)) or radiographer* or radiologist* or radiotherapist* or "radiograph* led" or "radiolog* led" or "radiotherap* led" or neuro-radiologi*).ti,ab,kw.                                                                                                                                                           |
|             |                                                                                                                                                                                                          | 68.                     | ((mammograph* or mammogram* or brachytherap* or dosimetr* or sonograph* or ultrasonograph* or ultrasound* or videofluoroscop* or videofluorograph* or VFS or VFG or fluoroscop* or fluorograph*) adj2 (clinical or clinician* or nurs* or scien* or technician* or technologist* or therap* or practice* or practis* or practitioner* or personnel* or occupation* or worker* or workforce* or provider* or manpower* or professional* or prescriber* or specialist*)) or mammographer* or brachytherapist* or dosimetrist* or sonographer* or ultrasonographer* or "mammograph* led" or "brachytherap* led" or "sonograph* led" or "ultrasonograph* led").ti,ab,kw. |
| 69.         | ((nuclear adj (medic* or radiolog*)) or "atomic medic*" or ((radioisotop* or radionucleotid*) adj2 (therap* or diagnos* or imaging)) or radiopharmaceut* or (radiotherap* adj2 (dosage* or planning)) or |                         |                                                                                                                                                                                                                                                                                                                                                                                                                                                                                                                                                                                                                                                                      |

| Search No.: | Professionals:                        | Search statement number | Search strategy                                                                                                                                                                                                                                                                                                                                                                                                                                                                                                                                                                                                                                                                                                                                                                  |
|-------------|---------------------------------------|-------------------------|----------------------------------------------------------------------------------------------------------------------------------------------------------------------------------------------------------------------------------------------------------------------------------------------------------------------------------------------------------------------------------------------------------------------------------------------------------------------------------------------------------------------------------------------------------------------------------------------------------------------------------------------------------------------------------------------------------------------------------------------------------------------------------|
|             |                                       |                         | (radiograph* adj imag*) or "radiation therap*" or biopsy or biopsies or aspiration) adj2 (clinical or clinician* or nurs* or scien* or technician* or technologist* or therap* or practice* or practis* or practitioner* or personnel* or occupation* or worker* or workforce* or provider* or manpower* or professional* or prescriber* or specialist*).ti,ab,kw.                                                                                                                                                                                                                                                                                                                                                                                                               |
|             |                                       | 70.                     | ((advanc* or exten* or expand* or enhanc* or consult* or refer* or prescrib* or prescrip* or triag*) adj3 ((radiograph* or radiologic* or radiotherap* or (diagnos* adj2 imag*) or radiation) adj2 (clinical or clinician* or nurs* or scien* or technician* or technologist* or therap* or practice* or practis* or practitioner* or personnel* or occupation* or worker* or workforce* or provider* or manpower* or professional* or specialist*)) or ((advanc* or exten* or expand* or enhanc* or consult* or refer* or prescrib* or prescrip* or triag*) adj2 (radiographer* or radiologist* or radiotherapist*)) or "radiograph* led" or "radiolog* led" or "radiotherap* led" or neuro-radiologi*).mp.                                                                     |
|             |                                       | 71.                     | ((advanc* or exten* or expand* or enhanc* or consult* or refer* or prescrib* or prescrip* or triag*) adj3 ((mammograph* or mammogram* or brachytherap* or dosimetr* or sonograph* or ultrasonograph* or ultrasound*) adj2 (clinical or clinician* or nurs* or scien* or technician* or technologist* or therap* or practice* or practis* or practitioner* or personnel* or occupation* or worker* or workforce* or provider* or manpower* or professional* or specialist*)) or ((advanc* or exten* or expand* or enhanc* or consult* or refer* or prescrib* or prescrip* or triag*) adj2 (mammographer* or brachytherapist* or dosimetrist* or sonographer* or ultrasonographer*)) or "mammograph* led" or "brachytherap* led" or "sonograph* led" or "ultrasonograph* led").mp. |
|             |                                       | 72.                     | ((advanc* or exten* or expand* or enhanc* or consult* or refer* or prescrib* or prescrip* or triag*) adj3 (((nuclear adj (medic* or radiolog*)) or "atomic medic*" or ((radioisotop* or radionucleotid*) adj2 (therap* or diagnos* or imaging)) or radiopharmaceut* or (radiotherap* adj2 (dosage* or planning)) or (radiograph* adj imag*) or "radiation therap*" or biopsy or biopsies or aspiration) adj2 (clinical or clinician* or nurs* or scien* or technician* or technologist* or therap* or practice* or practis* or practitioner* or personnel* or occupation* or worker* or workforce* or provider* or manpower* or professional* or specialist*))).mp.                                                                                                              |
|             |                                       | 73.                     | 67 or 68 or 69                                                                                                                                                                                                                                                                                                                                                                                                                                                                                                                                                                                                                                                                                                                                                                   |
| <b>21</b>   | <b>Speech and Language Therapists</b> | 74.                     | exp Speech Therapy/ or exp Language Therapy/ or exp Speech-Language Pathology/                                                                                                                                                                                                                                                                                                                                                                                                                                                                                                                                                                                                                                                                                                   |
|             |                                       | 75.                     | ((speech* or language*) adj2 (clinical or clinician* or nurs* or scien* or technician* or technologist* or therap* or patholog* or practice* or practis* or practitioner* or personnel* or occupation* or worker* or                                                                                                                                                                                                                                                                                                                                                                                                                                                                                                                                                             |

| Search No.: | Professionals:      | Search statement number | Search strategy                                                                                                                                                                                                                                                                                                                                                                                                                                                                                                                                                                                      |
|-------------|---------------------|-------------------------|------------------------------------------------------------------------------------------------------------------------------------------------------------------------------------------------------------------------------------------------------------------------------------------------------------------------------------------------------------------------------------------------------------------------------------------------------------------------------------------------------------------------------------------------------------------------------------------------------|
|             |                     |                         | workforce* or provider* or manpower* or professional* or prescriber* or specialist*) or ((SLT or SLTs or SLP or SLPs) not ("selective laser trabec*" or "structured light plethy*")) or ((speech* or language*) adj2 (therapist* or pathologist*)) or "SLT* led" or "SLP* led").ti,ab,kw.                                                                                                                                                                                                                                                                                                            |
|             |                     | 76.                     | ((advanc* or exten* or expand* or enhanc* or consult* or refer* or prescrib* or prescrip* or triag*) adj3 ((speech* or language*) adj2 (clinical or clinician* or nurs* or scien* or technician* or technologist* or therap* or patholog* or practice* or practis* or practitioner* or personnel* or occupation* or worker* or workforce* or provider* or manpower* or professional* or specialist*)) or ((speech* or language*) adj2 (therapist* or pathologist*)) or ((SLT or SLTs or SLP or SLPs) not ("selective laser trabec*" or "structured light plethy*")) or "SLT* led" or "SLP* led").mp. |
|             |                     | 77.                     | ((speech* or language*) adj2 (therapist* or pathologist*)) or (SLT or SLTs or SLP or SLPs) adj2 (ENT or (ear adj2 nose adj2 throat) or ((laryng* or nas*) adj2 endoscop*) or swallow* or dysphag* or tracheostom*).mp.                                                                                                                                                                                                                                                                                                                                                                               |
|             |                     | 78.                     | exp Fluoroscopy/                                                                                                                                                                                                                                                                                                                                                                                                                                                                                                                                                                                     |
|             |                     | 79.                     | (videofluoroscop* or videofluorograph* or VFS or VFG or fluoroscop* or fluorograph* or ((cine or photo) adj2 (radiograph* or fluorograph*))).mp.                                                                                                                                                                                                                                                                                                                                                                                                                                                     |
|             |                     | 80.                     | 74 or 75                                                                                                                                                                                                                                                                                                                                                                                                                                                                                                                                                                                             |
|             |                     | 81.                     | 78 or 79                                                                                                                                                                                                                                                                                                                                                                                                                                                                                                                                                                                             |
| <b>22</b>   | <b>Audiologists</b> | 82.                     | exp Audiology/ or exp Otolaryngology/                                                                                                                                                                                                                                                                                                                                                                                                                                                                                                                                                                |
|             |                     | 83.                     | (hearing* adj2 (dispens* or provid* or provis*)).ti,ab,kw.                                                                                                                                                                                                                                                                                                                                                                                                                                                                                                                                           |
|             |                     | 84.                     | ((hear or hears or hearing or ear or ears or deaf* or cochlear* or tinnit*) adj2 (clinical or clinician* or nurs* or scien* or technician* or technologist* or therap* or practice* or practis* or practitioner* or occupation* or personnel* or worker* or workforce* or manpower* or provider* or professional* or prescriber* or specialist*).ti,ab,kw.                                                                                                                                                                                                                                           |
|             |                     | 85.                     | ((audiolog* or audiometr* or ENT or (ear adj nose adj throat) or otolaryng* or otorhinolaryng* or otolog* or audiovestibular* or labyrinth* or vestibular*) adj2 (clinical or clinician* or nurs* or scien* or technician* or technologist* or therap* or practice* or practis* or practitioner* or occupation* or personnel* or worker* or workforce* or manpower* or provider* or professional* or specialist*)) or audiologist* or audiometrist* or "audiolog* led" or "audiometr* led").ti,ab,kw.                                                                                                |
|             |                     | 86.                     | ((advanc* or exten* or expand* or enhanc* or consult* or refer* or prescrib* or prescrip* or triag*) adj3 (audiolog* or audiometr* or ENT or (ear adj nose adj throat) or hear or hears or hearing or ear or ears or                                                                                                                                                                                                                                                                                                                                                                                 |

| Search No.: | Professionals:        | Search statement number | Search strategy                                                                                                                                                                                                                                                                                                                                                                                                                                                               |
|-------------|-----------------------|-------------------------|-------------------------------------------------------------------------------------------------------------------------------------------------------------------------------------------------------------------------------------------------------------------------------------------------------------------------------------------------------------------------------------------------------------------------------------------------------------------------------|
|             |                       |                         | deaf* or cochlear* or tinnit* or otolaryng* or otorhinolaryng* or otolog* or audiovestibular* or labyrinth* or vestibular*) adj2 (clinical or clinician* or nurs* or scien* or technician* or technologist* or therap* or practice* or practis* or practitioner* or occupation* or personnel* or worker* or workforce* or manpower* or provider* or professional* or specialist*)) or audiologist* or audiometrist* or "audiolog* led" or "audiometr* led").mp.               |
|             |                       | 87.                     | 82 or 83 or 84 or 85                                                                                                                                                                                                                                                                                                                                                                                                                                                          |
| 23          | Healthcare Scientists | 88.                     | exp Medical Laboratory Science/ or exp Medical Laboratory Personnel/                                                                                                                                                                                                                                                                                                                                                                                                          |
|             |                       | 89.                     | ((clinical* or biomed* or medical* or healthcare* or health care*) adj2 (scien* or technician* or technologist* or professional* or prescriber* or specialist*)) not (nurs* or therap* or patholog* or practice* or practis* or practitioner* or personnel* or occupation* or worker* or workforce* or provider* or manpower*).ti,ab,kw.                                                                                                                                      |
|             |                       | 90.                     | ((advanc* or exten* or expand* or enhanc* or consult* or refer* or prescrib* or prescrip* or triag*) adj3 (clinical* or biomed* or medical* or healthcare* or health care*) adj2 (nurs* or scien* or technician* or technologist* or therap* or patholog* or practice* or practis* or practitioner* or personnel* or occupation* or worker* or workforce* or provider* or manpower* or professional* or specialist)).mp.                                                      |
|             |                       | 91.                     | 88 or 89                                                                                                                                                                                                                                                                                                                                                                                                                                                                      |
| 8           | Psychologists         | 92.                     | exp Psychology/                                                                                                                                                                                                                                                                                                                                                                                                                                                               |
|             |                       | 93.                     | ((psycholog* or "high intensity" or "high-intensity") adj2 (clinical or clinician* or nurs* or scien* or technician* or technologist* or therap* or practice* or practis* or practitioner* or personnel* or occupation* or worker* or workforce* or provider* or manpower* or professional* or prescriber* or specialist*)) or psychologist* or PWP or PWPs or "psycholog* led").ti,ab,kw.                                                                                    |
|             |                       | 94.                     | ((advanc* or exten* or expand* or enhanc* or consult* or refer* or prescrib* or prescrip* or triag*) adj3 (psycholog* or "high intensity" or "high-intensity") adj2 (clinical or clinician* or nurs* or scien* or technician* or technologist* or therap* or practice* or practis* or practitioner* or personnel* or occupation* or worker* or workforce* or provider* or manpower* or professional* or specialist)) or psychologist* or PWP or PWPs or "psycholog* led").mp. |
|             |                       | 95.                     | 92 or 93                                                                                                                                                                                                                                                                                                                                                                                                                                                                      |
| 4           | Pharmacists           | 96.                     | exp Pharmacy/ or exp Community Pharmacy Services/ or exp Pharmacy Technicians/ or exp Pharmaceutical Services/                                                                                                                                                                                                                                                                                                                                                                |

| Search No.: | Professionals:        | Search statement number | Search strategy                                                                                                                                                                                                                                                                                                                                                                                                                                                                                                                                                                          |
|-------------|-----------------------|-------------------------|------------------------------------------------------------------------------------------------------------------------------------------------------------------------------------------------------------------------------------------------------------------------------------------------------------------------------------------------------------------------------------------------------------------------------------------------------------------------------------------------------------------------------------------------------------------------------------------|
|             |                       | 97.                     | ((pharmacy or pharmacies or pharmacist*) adj2 (clinical or clinician* or nurs* or scien* or technician* or technologist* or therap* or practice* or practis* or practitioner* or occupation* or personnel* or worker* or workforce* or manpower* or provider* or professional* or prescriber* or specialist*)) or APPP or APPPs or CPP or CPPs or "pharmacy led" or "pharmacist* led" or "pharmacy provided" or "pharmacist* provided" or "pharmacy delivered" or "pharmacist* delivered").ti,ab,kw.                                                                                     |
|             |                       | 98.                     | ((advanc* or exten* or expand* or enhanc* or consult* or refer* or prescrib* or prescrip* or triag*) adj3 (pharmacy or pharmacies or pharmacist*) adj2 (clinical or clinician* or nurs* or scien* or technician* or technologist* or therap* or practice* or practis* or practitioner* or occupation* or personnel* or worker* or workforce* or manpower* or provider* or professional* or specialist*)) or APPP or APPPs or CPP or CPPs or "pharmacy led" or "pharmacist* led" or "pharmacy provided" or "pharmacist* provided" or "pharmacy delivered" or "pharmacist* delivered").mp. |
|             |                       | 99.                     | exp Drug Utilization/ or exp Antimicrobial Stewardship/ or exp Medication Therapy Management/ or Polypharmacy/                                                                                                                                                                                                                                                                                                                                                                                                                                                                           |
|             |                       | 100.                    | ((pharmaceutic* or medication* or medicin* or polypharmac* or antimicrob* or antibiotic* or formular* or formulation*) adj2 (prescriber* or steward* or manag*)).ti,ab,kw.                                                                                                                                                                                                                                                                                                                                                                                                               |
|             |                       | 101.                    | ((advanc* or exten* or expand* or enhanc* or consult* or refer* or prescrib* or prescrip* or triag* or manag* or steward*) adj3 (clinical or clinician* or nurs* or scien* or technician* or technologist* or therap* or practice* or practis* or practitioner* or personnel* or occupation* or worker* or workforce* or provider* or manpower* or professional* or prescriber* or specialist*)).ti,ab,kw.                                                                                                                                                                               |
|             |                       | 102.                    | 96 or 97 or 100                                                                                                                                                                                                                                                                                                                                                                                                                                                                                                                                                                          |
|             |                       | 103.                    | 98 or (99 and 101)                                                                                                                                                                                                                                                                                                                                                                                                                                                                                                                                                                       |
| <b>6</b>    | <b>Dental Workers</b> | 104.                    | exp General Practice, Dental/ or exp Dental Facilities/ or exp Dental Health Services/ or exp Community Dentistry/ or exp Technology, Dental/                                                                                                                                                                                                                                                                                                                                                                                                                                            |
|             |                       | 105.                    | exp Dental Auxiliaries/ or Dental Staff/ or exp Dentists/ or exp Dentistry/ or exp Oral Health/ or exp Oral Hygiene/ or exp Dental Assistants/                                                                                                                                                                                                                                                                                                                                                                                                                                           |
|             |                       | 106.                    | 104 or 105                                                                                                                                                                                                                                                                                                                                                                                                                                                                                                                                                                               |
|             |                       | 107.                    | ((dental* or dentist* or dentit* or oral*) adj2 (assist* or associat* or auxiliar* or hygien*) adj2 (clinical or clinician* or nurs* or scien* or technician* or technologist* or therap* or practice* or practis* or practitioner* or occupation* or personnel* or worker* or workforce* or manpower* or provider* or professional* or prescriber* or specialist*)).ti,ab,kw.                                                                                                                                                                                                           |

| Search No.: | Professionals:          | Search statement number | Search strategy                                                                                                                                                                                                                                                                                                                                                                                                                                                                                              |
|-------------|-------------------------|-------------------------|--------------------------------------------------------------------------------------------------------------------------------------------------------------------------------------------------------------------------------------------------------------------------------------------------------------------------------------------------------------------------------------------------------------------------------------------------------------------------------------------------------------|
|             |                         | 108.                    | ((dental* or dentist* or dentit*) adj2 (clinical or clinician* or nurs* or scien* or technician* or technologist* or therap* or practice* or practis* or practitioner* or occupation* or personnel* or worker* or workforce* or manpower* or provider* or professional* or prescriber* or specialist*)) or endontist* or orthodontist* or "dentist* led" or "orthodont* led").ti,ab,kw.                                                                                                                      |
|             |                         | 109.                    | ((dental* or dentist* or dentit*) adj2 (service* or clinic* or centre* or center* or program* or facilit* or unit*) or "dental care" or "dental healthcare" or "dental health care") adj2 (nurs* or scien* or technician* or technologist* or therap* or practice* or practis* or practitioner* or occupation* or personnel* or worker* or workforce* or manpower* or provider* or professional* or prescriber* or specialist*).ti,ab,kw.                                                                    |
|             |                         | 110.                    | ((advanc* or exten* or expand* or enhanc* or consult* or refer* or prescrib* or prescrip* or triag*) adj3 (dental* or dentist* or dentit* or oral* or endont* or orthodont*) adj2 (clinical or clinician* or nurs* or scien* or technician* or technologist* or therap* or practice* or practis* or practitioner* or occupation* or personnel* or worker* or workforce* or manpower* or provider* or professional* or specialist*)) or endotist* or orthodontist* or "dentist* led" or "orthodont* led").mp. |
|             |                         | 111.                    | 107 or 108 or 109                                                                                                                                                                                                                                                                                                                                                                                                                                                                                            |
|             |                         | 112.                    | 106 or 111                                                                                                                                                                                                                                                                                                                                                                                                                                                                                                   |
| 10          | Social Workers          | 113.                    | exp Social Workers/ or exp Social Work/                                                                                                                                                                                                                                                                                                                                                                                                                                                                      |
|             |                         | 114.                    | (social* adj work* adj2 (clinical or clinician* or nurs* or scien* or technician* or technologist* or therap* or practice* or practis* or practitioner* or personnel* or occupation* or provider* or manpower* or professional* or prescriber*).ti,ab,kw.                                                                                                                                                                                                                                                    |
|             |                         | 115.                    | ((advanc* or exten* or expand* or enhanc* or consult* or refer* or prescrib* or prescrip* or triag*) adj3 social* adj2 (clinical or clinician* or nurs* or scien* or technician* or technologist* or therap* or practice* or practis* or practitioner* or personnel* or occupation* or worker* or workforce* or provider* or manpower* or professional*).mp.                                                                                                                                                 |
|             |                         | 116.                    | 113 or 114                                                                                                                                                                                                                                                                                                                                                                                                                                                                                                   |
| 24          | Local authority workers | 117.                    | (local adj (authorit* or government* or council*).mp.                                                                                                                                                                                                                                                                                                                                                                                                                                                        |
|             |                         | 118.                    | exp Local Government/                                                                                                                                                                                                                                                                                                                                                                                                                                                                                        |
|             |                         | 119.                    | 117 or 118                                                                                                                                                                                                                                                                                                                                                                                                                                                                                                   |
|             |                         | 120.                    | exp State Medicine/ or exp Social Welfare/ or exp Mental Health Services/ or exp Community Mental Health Services/ or exp Public Health/                                                                                                                                                                                                                                                                                                                                                                     |

| Search No.: | Professionals:                                       | Search statement number | Search strategy                                                                                                                                                                                                                                                                                   |
|-------------|------------------------------------------------------|-------------------------|---------------------------------------------------------------------------------------------------------------------------------------------------------------------------------------------------------------------------------------------------------------------------------------------------|
|             |                                                      | 121.                    | exp Child Welfare/ or exp Child Health Services/ or exp Foster Home Care/ or exp Adolescent Health Services/ or exp Transition to Adult Care/                                                                                                                                                     |
|             |                                                      | 122.                    | exp "Continuity of Patient Care"/ or exp Home Care Services/ or exp Nursing Homes/ or exp Residential Facilities/ or exp Homes for the Aged/ or exp Respite Care/                                                                                                                                 |
|             |                                                      | 123.                    | 120 or 121 or 122                                                                                                                                                                                                                                                                                 |
|             |                                                      | 124.                    | ((advanced adj2 practitioner*) or (advanced adj2 (practice* or practise*))).ti,ab,kw.                                                                                                                                                                                                             |
|             |                                                      | 125.                    | ((advanc* or exten* or expand* or enhanc* or consult* or refer* or triag*) adj2 (prescrib* or prescrip*)).ti,ab,kw.                                                                                                                                                                               |
|             |                                                      | 126.                    | ((advanc* or exten* or expand* or enhanc* or consult* or refer* or prescrib* or prescrip* or triag*) adj2 (practice* or practis* or practitioner* or provider* or professional* or specialist*)).ti,ab,kw.                                                                                        |
|             |                                                      | 127.                    | (119 or 123) and (124 or 125 or 126)                                                                                                                                                                                                                                                              |
| 25          | Criminal justice workers                             | 128.                    | exp Criminology/ or exp Domestic Violence/ or exp Criminals/ or exp Prisoners/ or exp Prisons/ or exp Jurisprudence/ or exp Emergency Responders/ or exp Police/                                                                                                                                  |
|             |                                                      | 129.                    | exp forensic sciences/ or exp forensic dentistry/ or exp forensic medicine/ or exp forensic nursing/ or exp forensic psychology/ or exp forensic toxicology/ or exp forensic psychiatry/ or exp forensic radiography/                                                                             |
|             |                                                      | 130.                    | 128 or 129                                                                                                                                                                                                                                                                                        |
|             |                                                      | 131.                    | (safeguard* or warden* or warder* or guard* or custodian* or custody* or prison* or probation* or police* or forensic* or law* or unlawful* or legal* or illegal* or legislat* or juris* or judic* or prosecut* or criminal* or offender* or suspect* or jail* or gaol*).mp.                      |
|             |                                                      | 132.                    | (130 or 131) and (124 or 125 or 126)                                                                                                                                                                                                                                                              |
| 26          | NHS commissioned voluntary & private service workers | 133.                    | exp Private Sector/                                                                                                                                                                                                                                                                               |
|             |                                                      | 134.                    | exp Public-Private Sector Partnerships/                                                                                                                                                                                                                                                           |
|             |                                                      | 135.                    | exp Preferred Provider Organizations/                                                                                                                                                                                                                                                             |
|             |                                                      | 136.                    | ((private* or independent* or outsourc* or out-sourc* or "public-private" or "non-government*" or NGO* or CCG) adj3 (commission* or sector* or partner* or provid* or provis* or compan* or organisation* or organization* or enterpris* or consorti* or franchis* or contract* or partner*)).mp. |
|             |                                                      | 137.                    | 133 or 134 or 135 or 136                                                                                                                                                                                                                                                                          |
|             |                                                      | 138.                    | exp Volunteers/                                                                                                                                                                                                                                                                                   |
|             |                                                      | 139.                    | exp charities/ or exp faith-based organizations/ or exp organizations, nonprofit/ or exp self-help groups/                                                                                                                                                                                        |

| Search No.: | Professionals:                   | Search statement number | Search strategy                                                                                                                                                                                                                                                                                                                                                                                                                                                                                                                                                                                                                                                                                                                                                                                                                                                                                                                                                                                                                                                                                                                                                                        |
|-------------|----------------------------------|-------------------------|----------------------------------------------------------------------------------------------------------------------------------------------------------------------------------------------------------------------------------------------------------------------------------------------------------------------------------------------------------------------------------------------------------------------------------------------------------------------------------------------------------------------------------------------------------------------------------------------------------------------------------------------------------------------------------------------------------------------------------------------------------------------------------------------------------------------------------------------------------------------------------------------------------------------------------------------------------------------------------------------------------------------------------------------------------------------------------------------------------------------------------------------------------------------------------------|
|             |                                  | 140.                    | ((charit* or nonprofit* or "non-profit*" or volunt* or "3rd sector" or "third sector") adj3 (commission* or sector* or partner* or provid* or provis* or compan* or organisation* or organization* or enterpris* or consorti* or franchis* or contract* or partner*)) or "social enterprise*").mp.                                                                                                                                                                                                                                                                                                                                                                                                                                                                                                                                                                                                                                                                                                                                                                                                                                                                                     |
|             |                                  | 141.                    | 138 or 139 or 140                                                                                                                                                                                                                                                                                                                                                                                                                                                                                                                                                                                                                                                                                                                                                                                                                                                                                                                                                                                                                                                                                                                                                                      |
|             |                                  | 142.                    | (137 or 141) and (124 or 125 or 126)                                                                                                                                                                                                                                                                                                                                                                                                                                                                                                                                                                                                                                                                                                                                                                                                                                                                                                                                                                                                                                                                                                                                                   |
|             |                                  |                         |                                                                                                                                                                                                                                                                                                                                                                                                                                                                                                                                                                                                                                                                                                                                                                                                                                                                                                                                                                                                                                                                                                                                                                                        |
|             | <b>"advanced practice" terms</b> | 143.                    | exp "Referral and Consultation"/ or exp Triage/                                                                                                                                                                                                                                                                                                                                                                                                                                                                                                                                                                                                                                                                                                                                                                                                                                                                                                                                                                                                                                                                                                                                        |
|             |                                  | 144.                    | exp Professional Role/ or exp Professional Competence/ or exp "Attitude of Health Personnel"/ or exp Credentialing/                                                                                                                                                                                                                                                                                                                                                                                                                                                                                                                                                                                                                                                                                                                                                                                                                                                                                                                                                                                                                                                                    |
|             |                                  | 145.                    | ((autonom* or unsupervised or non-supervis* or "not under supervision" or independen* or responsib* or qualif* or professional* or licenced or licensed or licensure* or certif* or accredit* or credential* or registered or registrat* or authorit* or authorised or authorized) adj2 (clinician* or nurs* or scien* or technician* or technologist* or therap* or practice* or practis* or practitioner* or prescriber* or occupation* or personnel* or worker* or workforce* or manpower* or provider* or specialist*).ti,ab,kw.                                                                                                                                                                                                                                                                                                                                                                                                                                                                                                                                                                                                                                                   |
|             |                                  | 146.                    | (Extended scope or "Hybrid practitioner*" or Multipract* or Multi-pract* or Multidisciplin* or Multi-disciplin* or Multiprofession* or Multi-profession* or Multispecial* or Multi-special* or Multiagenc* or Multi-agenc* or Multiinstitut* or Multi-institut* or Interpract* or Inter-pract* or Interdisciplin* or Inter-disciplin* or Interprofession* Inter-profession* or Interspecial* or Inter-special* or Interdepend* or Inter-depend* or Interagenc* or Inter-agenc* or Interinstitut* or Inter-institut* or Metapract* or Meta-pract* or Metaprofession* or Meta-profession* or Metadisciplin* or Meta-disciplin* or Metaspecial* or Meta-special* or Meta-agenc* or Meta-institut* or Transpract* or Trans-pract* or Transprofession* or Trans-profession* or Transdisciplin* or Trans-disciplin* or Transspecial* or Trans-special* or Transagenc* or Trans-agenc* or Transinstitut* or Trans-institut* or crosspract* or cross-pract* or crossdisciplin* or cross-disciplin* or crossprofession* or cross-profession* or crossspecial* or cross-special* or crossdepend* or cross-depend* or crossagenc* or cross-agenc* or crossinstitut* or cross-institut*).ti,ab,kw. |
|             |                                  | 147.                    | exp Interprofessional Relations/ or exp Interdisciplinary Communication/ or exp Interinstitutional Relations/                                                                                                                                                                                                                                                                                                                                                                                                                                                                                                                                                                                                                                                                                                                                                                                                                                                                                                                                                                                                                                                                          |
|             |                                  | 148.                    | (non-physician* or non-special* or non-clinic* or non-medical* or ((first or 1st) adj2 contact) or FCP or frontline* or front-line* or urgent* or emergenc* or A&E or unscheduled* or ambulator* or outpatient*).ti,ab,kw.                                                                                                                                                                                                                                                                                                                                                                                                                                                                                                                                                                                                                                                                                                                                                                                                                                                                                                                                                             |

| Search No.: | Professionals:                                                                                        | Search statement number | Search strategy                                                                                                                                                                                                                       |
|-------------|-------------------------------------------------------------------------------------------------------|-------------------------|---------------------------------------------------------------------------------------------------------------------------------------------------------------------------------------------------------------------------------------|
|             |                                                                                                       | 149.                    | 143 or 144 or 145 or 146 or 147 or 148                                                                                                                                                                                                |
|             |                                                                                                       |                         |                                                                                                                                                                                                                                       |
|             | <b>Modified Medline UK filter</b>                                                                     | 150.                    | exp United Kingdom/                                                                                                                                                                                                                   |
|             |                                                                                                       | 151.                    | (national health service* or nhs*).ti,ab,in,kw.                                                                                                                                                                                       |
|             |                                                                                                       | 152.                    | (english not ((published or publication* or translat* or written or language* or speak* or literature or citation*) adj5 english)).ti,ab.                                                                                             |
|             |                                                                                                       | 153.                    | (gb or "g.b." or britain* or (british* not "british columbia") or uk or "u.k.                                                                                                                                                         |
|             |                                                                                                       | 154.                    | ((northern ireland* or northern irish*) not ((ireland* or irish*) not (gb or "g.b." or britain* or british* or uk or "u.k." or united kingdom* or england* or scotland* or scottish* or wales* or wales* or welsh*))).ti,ab,jw,in,kw. |
|             |                                                                                                       | 155.                    | (exp africa/ or exp americas/ or exp antarctic regions/ or exp arctic regions/ or exp asia/ or exp oceania/) not (exp united kingdom/ or exp europe/)                                                                                 |
|             |                                                                                                       | 156.                    | 150 or 151 or 152 or 153 or 154                                                                                                                                                                                                       |
|             |                                                                                                       | 157.                    | 156 not 155                                                                                                                                                                                                                           |
|             |                                                                                                       |                         |                                                                                                                                                                                                                                       |
|             |                                                                                                       | 158.                    | 3 or 8 or 12 or 16 or 20 or 27 or 31 or 35 or 39 or 43 or 47 or 51 or 52 or 53 or 59 or 63 or 73 or 87 or 91 or 95 or 102 or 112 or 116 or 127 or 132 or 142                                                                          |
|             |                                                                                                       | 159.                    | 158 and 149                                                                                                                                                                                                                           |
|             | Terms in search statement 81 serve as additional "advanced practice" for Speech & Language Therapists | 160.                    | 80 and (81 or 149)                                                                                                                                                                                                                    |
|             |                                                                                                       | 161.                    | 4 or 7 or 11 or 15 or 19 or 25 or 26 or 30 or 34 or 38 or 42 or 46 or 50 or 54 or 55 or 58 or 62 or 66 or 70 or 71 or 72 or 76 or 77 or 86 or 90 or 94 or 103 or 110 or 115                                                           |
|             |                                                                                                       | 162.                    | 159 or 160 or 161                                                                                                                                                                                                                     |
|             |                                                                                                       | 163.                    | 162 and 157                                                                                                                                                                                                                           |
|             |                                                                                                       | 164.                    | limit 163 to yr="2005 - 2020"                                                                                                                                                                                                         |
|             |                                                                                                       | 165.                    | (case reports or comment or editorial or letter or news).pt.                                                                                                                                                                          |
|             |                                                                                                       | 166.                    | 164 not 165                                                                                                                                                                                                                           |
