# Supplementary material
Source: HighWire-hosted journal article supplement (https://bmjopen.bmj.com/content/10/5/e036192)
Supplement: inline-supplementary-material-3 [file inline-supplementary-material-3.pdf]

### **Supplementary File 3 – Template for Extraction of Study Characteristics and Structural Information**

#### **Basic study characteristics**

- Author and year
- UK country
- Research setting
- Number of research sites
- Study aims
- Patient/client group
- Research methodology
- Data collection methods
- Study participants
- Outcome measures
- Author conclusions
- Type of publication
- JBI level of evidence

#### **Study characteristics illuminating ‘structural’ aspects of ACP role implementation and evaluation<sup>1</sup>**

- ACP role title
- Aspect of ACP role reported (clinical, education, research leadership)
- Role definition
- Rationale for role introduction
- NHS band level of the role (if mentioned)
- Stage of role implementation (introduction stage, implementation stage, long term sustainability stage)

---

<sup>1</sup> Adapted from: Bryant-Lukosius D, Spichiger E, Martin J, Stoll H, Kellerhals SD, Fliedner M, et al. Framework for evaluating the impact of advanced practice nursing roles. *Journal of Nursing Scholarship* 2016;48(2):201-09.
