# Supplementary material
Source: HighWire-hosted journal article supplement (https://bmjopen.bmj.com/content/10/5/e036192)
Supplement: inline-supplementary-material-4 [file inline-supplementary-material-4.pdf]

Supplementary File 4: Template for Extraction of Process and Outcome Domains<sup>1</sup>

| PROCESS DOMAINS     | Implementation Issues                                                                                      |
|---------------------|------------------------------------------------------------------------------------------------------------|
| PROCESS SUB-DOMAINS | <ul style="list-style-type: none"> <li>• Barriers</li> <li>• Facilitators</li> <li>• Challenges</li> </ul> |

| OUTCOME DOMAINS     | Patient and family outcomes                                                                                                                         | Quality of care outcomes                                                                                                  | Healthcare provider and stakeholder outcomes                                                                                                                                             | Healthcare use and cost                                                                                                                                                                                          | Organisation, professional and workforce issues                                                                                                                                                          |
|---------------------|-----------------------------------------------------------------------------------------------------------------------------------------------------|---------------------------------------------------------------------------------------------------------------------------|------------------------------------------------------------------------------------------------------------------------------------------------------------------------------------------|------------------------------------------------------------------------------------------------------------------------------------------------------------------------------------------------------------------|----------------------------------------------------------------------------------------------------------------------------------------------------------------------------------------------------------|
| OUTCOME SUB-DOMAINS | <ul style="list-style-type: none"> <li>• Health status</li> <li>• Health behaviours</li> <li>• Perceptions and experiences of healthcare</li> </ul> | <ul style="list-style-type: none"> <li>• Access to care</li> <li>• Patient safety</li> <li>• Processes of care</li> </ul> | <ul style="list-style-type: none"> <li>• Healthcare team performance</li> <li>• Acceptance of, and satisfaction with role</li> <li>• Role support</li> <li>• Job satisfaction</li> </ul> | <ul style="list-style-type: none"> <li>• Cost avoidance and savings</li> <li>• Use of healthcare services</li> <li>• Revenue generation</li> <li>• Admission rates</li> <li>• Length of hospital stay</li> </ul> | <ul style="list-style-type: none"> <li>• Staff recruitment and retention</li> <li>• Career progression</li> <li>• Autonomy</li> <li>• Identity</li> <li>• Continuous professional development</li> </ul> |

<sup>1</sup> Adapted from: Bryant-Lukosius D, Spichiger E, Martin J, Stoll H, Kellerhals SD, Fliedner M, et al. Framework for evaluating the impact of advanced practice nursing roles. *Journal of Nursing Scholarship* 2016;48(2):201-09.

**Sub-sub domains within two of the main outcome domains (the others do not currently have any pre-specified sub-sub domains)**

| <b>Patient and Family Outcomes</b>              | <b>Examples of pre-specified sub-sub Domains</b>                                                                                                                                                                                                                          |
|-------------------------------------------------|---------------------------------------------------------------------------------------------------------------------------------------------------------------------------------------------------------------------------------------------------------------------------|
| <b>Health Status</b>                            | <ul style="list-style-type: none"> <li>• quality of life</li> <li>• symptom control</li> <li>• physical and mental health</li> <li>• morbidity</li> <li>• functional ability (e.g., perform activities of daily living)</li> <li>• disease specific indicators</li> </ul> |
| <b>Health behaviours</b>                        | <ul style="list-style-type: none"> <li>• self-management/self-efficacy</li> <li>• knowledge and skills</li> <li>• adherence</li> <li>• life style, involvement in healthcare decision-making</li> </ul>                                                                   |
| <b>Perceptions and experience of healthcare</b> | <ul style="list-style-type: none"> <li>• satisfaction with care</li> <li>• patient-centredness</li> <li>• preferences</li> <li>• safety</li> </ul>                                                                                                                        |

| <b>Quality of Care</b>   | <b>Examples of pre-specified sub-sub Domains</b>                                                                                                                                                |
|--------------------------|-------------------------------------------------------------------------------------------------------------------------------------------------------------------------------------------------|
| <b>Patient safety</b>    | <ul style="list-style-type: none"> <li>• adverse events</li> <li>• complication rates</li> </ul>                                                                                                |
| <b>Processes of care</b> | <ul style="list-style-type: none"> <li>• appropriateness</li> <li>• medication use</li> <li>• continuity of care</li> <li>• care coordination</li> <li>• adherence to best practices</li> </ul> |
| <b>Access to care</b>    | <ul style="list-style-type: none"> <li>• timeliness</li> <li>• responsiveness</li> <li>• equity</li> </ul>                                                                                      |
